# Supplementary material
Source: publisher figshare collection journal article supplement (https://frontiersin.figshare.com/ndownloader/files/18737390)
Supplement: Supplementary file [file 18737390]

Scenario\_4

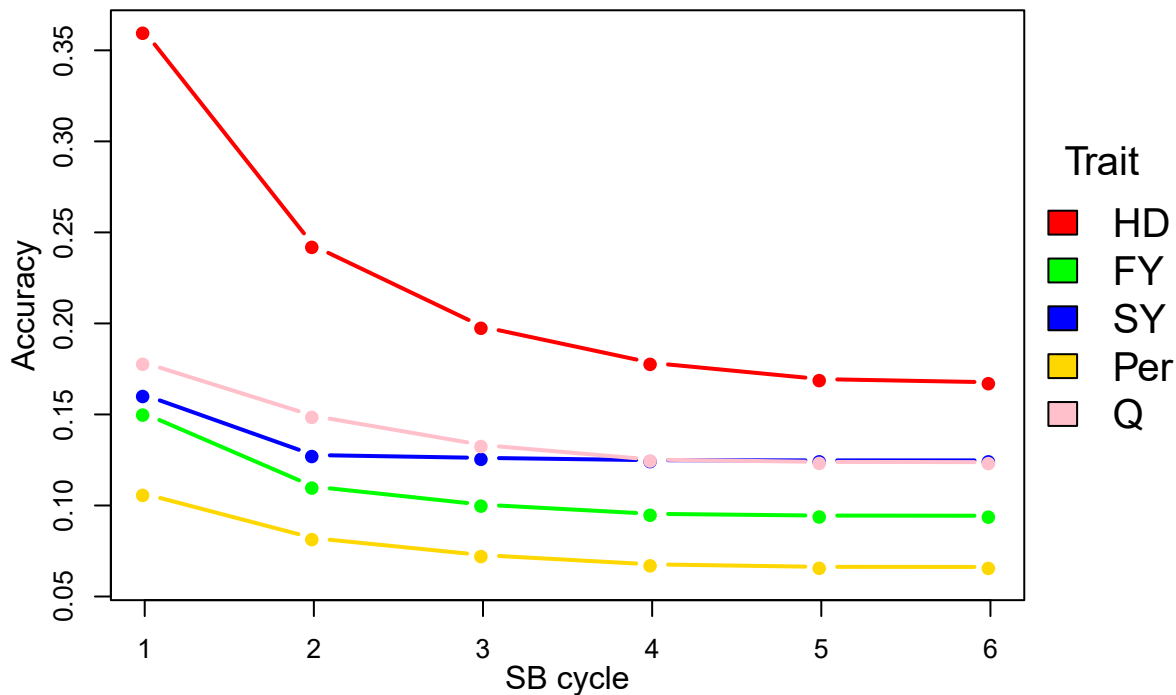

Figure S3. The changes in the accuracy of genomic selection over six SB rounds for scenario four.
